# Supplementary material for: Microbial community structure analysis in Acer palmatum bark and isolation of novel bacteria IAD-21 of the candidate division FBP
Source: PeerJ. 2019 Oct 29;7:e7876. doi: 10.7717/peerj.7876 (PMC6824334; doi:10.7717/peerj.7876)
Supplement: Supplemental Information 2 [file peerj-07-7876-s002.xlsx]

## Sheet: Sheet1
	Supplemental Table S2 Sequences used for phylogenetic analysis.
	Candidate division FBP		Armatimonadetes		Candidate division WS1		Actinobacteria		Chloroflexi
	Uncultured bacterium clone YZ718 (KF037536)		Uncultured candidate division OP10 bacterium clone PRD18H01 (AY948065)		Uncultured bacterium clone:JTB326 (AB015272)		Streptomyces glaucus NBRC15417 T (AB184665)		Roseiflexus castenholzii HLO8 T (AB041226)
	Uncultured bacterium clone YL406 (KF037618)		Uncultured bacterium SJA-121 (AJ009490)		Uncultured bacterium clone B01R003 (AY197424)		Streptomyces cinereospinus NBRC15397 T (AB184648)		Herpetosiphon geysericola ATCC23076 T (AF039293)
	Uncultured bacterium clone UMAB-cl-090 (FR749715)		Uncultured bacterium SJA-22 (AJ009456)		Uncultured Unclassified bacterium clone QEDP3AH06 (CU924237)		Streptomyces burgazadensis Z1R7 T (KF793919)		Herpetosiphon aurantiacus ATCC23779 T (CP000875)
	Uncultured bacterium clone ncd2029d01c1 (JF181172)		Uncultured bacterium SBR1039 (X84482)		Uncultured bacterium clone 23g04 (EF515388)		Streptomyces asiaticus A14P1 T (AJ391830)		Chloroflexus aurantiacus J-10-fl T (D38365)
	Uncultured bacterium clone ncd2024h05c1 (JF167832)		Uncultured bacterium clone R58 (EU445226)		Uncultured organism clone MAT-CR-P1-B07 (EU245988)		Streptomyces albus NBRC3710 T (AB184781)		Chloroflexus aggregans DSM9485 T (CP001337)
	Uncultured bacterium clone ncd1960f07c1 (JF171142)		Uncultured bacterium clone PK7 (AY555775)		Uncultured bacterium clone 5F2-15 (GQ472455)		Actinomyces weissii 2298_06 T (FN552454)
	Uncultured bacterium clone ncd1957b07c1 (JF170899)		Uncultured bacterium clone FFCH11771 (EU134987)		Uncultured bacterium clone De3230 (HQ183991)		Actinomyces urogenitalis CCUG38702 T (AJ243791)
	Uncultured bacterium clone ncd270f08c1 (HM263439)		Uncultured bacterium clone FFCH7771 (EU135026)		Uncultured bacterium clone 4 (AJ543756)		Actinomyces ruminicola B71 T (DQ072005)
	Uncultured bacterium clone ncd266h11c1 (HM263359)		Uncultured bacterium clone FCPO562 (EF515962)				Actinomyces oris ATCC27044 T (GQ421308)
	Uncultured bacterium clone ncd244h04c1 (HM269200)		Fimbriimonas ginsengisoli Gsoil_348 T (GQ339893)				Actinomyces neuii subsp. neuii 97_90 T (X71861)
	Uncultured bacterium clone ncd242h05c1 (HM269099)		Chthonomonas calidirosea T49 T (AM749780)				Actinomyces graevenitzii CCUG27294 T (AJ540309)
	Uncultured bacterium clone nbw112e12c1 (GQ008023)		Candidate division OP10 bacterium P488 (AM749768)				Actinomyces bovis NCTC11535 T (X81061)
	Uncultured bacterium clone 0502TCLN088 (AB695820)		Armatimonas rosea YO-36T (AB529679)
	Uncultured bacterium clone 0502TCLN087 (AB695819)		Uncultured bacterium clone: 1174-1091-13 (AB128880)
	Bacterium strain R-68213 (KY386500)		Uncultured bacterium clone FW68 (AF524022)
	Bacterium strain R-68168 (KY386300)		Uncultured bacterium clone 300C-H01 (AY661983)
	Uncultured bacterium clone TIGU971 (HM559209)		Uncultured bacterium clone: MPB2-246 (AB630922)
	Uncultured bacterium partial clone UMAB-cl-150 (FR749775)		Uncultured bacterium SJA-171 (AJ009501)
	Uncultured bacterium clone ncd243c05c1 (HM269093)		Uncultured bacterium clone: GAB-B06 (AB183862)
	Uncultured bacterium clone FQSS121 (EF522341)		Uncultured bacterium clone: RB046 (AB240295)
	Uncultured bacterium clone ncd1786f06c2 (JF154853)		Candidate division OP10 clone OPB50 (AF027092)
	Uncultured endolithic bacterium clone 1B-WNS (AB374366)		Uncultured candidate division OP10 bacterium clone B05_WMSP1 (DQ450815)
	Uncultured bacterium clone nbw689e06c1 (GQ116227)		Uncultured bacterium #0319-6E2 (AF234129)
	Uncultured bacterium clone ncd2014e04c1 (JF174680)		Uncultured candidate division OP10 bacterium clone AMCF4 (AM935682)
	Uncultured bacterium clone ncd2612d10c1 (JF219978)		Uncultured bacterium clone SHA-37 (AJ306784)
	Uncultured bacterium clone ncd559g04c1 (HM278725)		Uncultured bacterium clone KD5-31 (AY188316)
			Candidate division OP10 clone OPB90 (AF027090)
			Uncultured Armatimonadetes bacterium clone TP104 (EF205558)
			Uncultured bacterium clone SM2G08 (AF445740)
			Uncultured bacterium clone GAL02 (DQ324867)
			Uncultured bacterium clone MD2902-B50 (EU385871)
			Uncultured Armatimonadetes bacterium clone Z53M92B (FJ484560)
