# Supplementary material for: Microbial community structure analysis inAcer palmatumbark and isolation of novel bacteria IAD-21 of the candidate division FBP
Source: PeerJ journal article supplement (doi:10.7717/peerj.7876), 2019-10-29
Supplement: Supplemental_Table_S2-revised.xlsx [file Supplemental_Table_S2-revised.xlsx]

## Sheet: Sheet1
	Supplemental Table S2 Sequences used for phylogenetic analysis.
	Abditibacteriota		Armatimonadetes		Candidate division WS1		Deinococcus-Thermus		Chloroflexi
	Uncultured bacterium clone YZ718 (KF037536)		Uncultured candidate division OP10 bacterium clone PRD18H01 (AY948065)		Uncultured bacterium clone:JTB326 (AB015272)		Deinococcus radiodurans strain DSM 20539 T (Y11332)		Roseiflexus castenholzii HLO8 T (AB041226)
	Uncultured bacterium clone YL406 (KF037618)		Uncultured bacterium SJA-121 (AJ009490)		Uncultured bacterium clone B01R003 (AY197424)		Vulcanithermus mediatlanticus strain TR T (AJ507298)		Herpetosiphon geysericola ATCC23076 T (AF039293)
	Uncultured bacterium clone UMAB-cl-090 (FR749715)		Uncultured bacterium SJA-22 (AJ009456)		Uncultured Unclassified bacterium clone QEDP3AH06 (CU924237)		Truepera radiovictrix DSM 17093 strain RQ-24 T (DQ022076)		Herpetosiphon aurantiacus ATCC23779 T (CP000875)
	Uncultured bacterium clone ncd2029d01c1 (JF181172)		Uncultured bacterium SBR1039 (X84482)		Uncultured bacterium clone 23g04 (EF515388)		Oceanithermus profundus strain DSM 14977 T (CP002361)		Chloroflexus aurantiacus J-10-fl T (D38365)
	Uncultured bacterium clone ncd2024h05c1 (JF167832)		Uncultured bacterium clone R58 (EU445226)		Uncultured organism clone MAT-CR-P1-B07 (EU245988)		Thermus aquaticus strain YT-1 T (L09663)		Chloroflexus aggregans DSM9485 T (CP001337)
	Uncultured bacterium clone ncd1960f07c1 (JF171142)		Uncultured bacterium clone PK7 (AY555775)		Uncultured bacterium clone 5F2-15 (GQ472455)
	Uncultured bacterium clone ncd1957b07c1 (JF170899)		Uncultured bacterium clone FFCH11771 (EU134987)		Uncultured bacterium clone De3230 (HQ183991)
	Uncultured bacterium clone ncd270f08c1 (HM263439)		Uncultured bacterium clone FCPO562 (EF515962)		Uncultured bacterium clone 4 (AJ543756)
	Uncultured bacterium clone ncd266h11c1 (HM263359)		Fimbriimonas ginsengisoli Gsoil_348 T (GQ339893)
	Uncultured bacterium clone ncd244h04c1 (HM269200)		Chthonomonas calidirosea T49 T (AM749780)
	Uncultured bacterium clone ncd242h05c1 (HM269099)		Candidate division OP10 bacterium P488 (AM749768)
	Uncultured bacterium clone nbw112e12c1 (GQ008023)		Armatimonas rosea YO-36T (AB529679)
	Uncultured bacterium clone 0502TCLN088 (AB695820)		Uncultured bacterium clone: 1174-1091-13 (AB128880)
	Uncultured bacterium clone 0502TCLN087 (AB695819)		Uncultured bacterium clone FW68 (AF524022)
	Abditibacterium utsteinense strain R-68213T (KY386500)		Uncultured bacterium clone 300C-H01 (AY661983)
	Abditibacterium utsteinense strain R-68168 (KY386300)		Uncultured bacterium clone: MPB2-246 (AB630922)
	Uncultured bacterium clone TIGU971 (HM559209)		Uncultured bacterium SJA-171 (AJ009501)
	Uncultured bacterium partial clone UMAB-cl-150 (FR749775)		Uncultured bacterium clone: GAB-B06 (AB183862)
	Uncultured bacterium clone ncd243c05c1 (HM269093)		Uncultured bacterium clone: RB046 (AB240295)
	Uncultured bacterium clone FQSS121 (EF522341)		Candidate division OP10 clone OPB50 (AF027092)
	Uncultured bacterium clone ncd1786f06c2 (JF154853)		Uncultured candidate division OP10 bacterium clone B05_WMSP1 (DQ450815)
	Uncultured endolithic bacterium clone 1B-WNS (AB374366)		Uncultured bacterium #0319-6E2 (AF234129)
	Uncultured bacterium clone nbw689e06c1 (GQ116227)		Uncultured candidate division OP10 bacterium clone AMCF4 (AM935682)
	Uncultured bacterium clone ncd2014e04c1 (JF174680)		Candidate division OP10 clone OPB90 (AF027090)
	Uncultured bacterium clone ncd2612d10c1 (JF219978)		Uncultured Armatimonadetes bacterium clone TP104 (EF205558)
	Uncultured bacterium clone ncd559g04c1 (HM278725)		Uncultured bacterium clone SM2G08 (AF445740)
			Uncultured bacterium clone GAL02 (DQ324867)
			Uncultured bacterium clone MD2902-B50 (EU385871)
			Uncultured Armatimonadetes bacterium clone Z53M92B (FJ484560)
