# Supplementary material for: Microbial community structure analysis inAcer palmatumbark and isolation of novel bacteria IAD-21 of the candidate division FBP
Source: PeerJ journal article supplement (doi:10.7717/peerj.7876), 2019-10-29
Supplement: Supplemental_Table_S3-revised.xlsx [file Supplemental_Table_S3-revised.xlsx]

## Sheet: Sheet1
	Supplemental Table S3 Percentage of top 30 genera detected by culture-independent analysis from Acer palmatum bark.
	Genus inferred to derive from chloroplast/mitochondria sequence and unassigned sequence was excluded from the list.
	A (Nov. 2015)				A-1 (Feb. 2018)				A-2 (Feb. 2018)				A-3 (Feb. 2018)				B-1 (Feb. 2018)				B-2 (Feb. 2018)				B-3 (Feb. 2018)
	Phylum	Genus	% in total reads		Phylum	Genus	% in total reads		Phylum	Genus	% in total reads		Phylum	Genus	% in total reads		Phylum	Genus	% in total reads		Phylum	Genus	% in total reads		Phylum	Genus	% in total reads
	Bacteroidetes	Unidentified genus in Chitinophagaceae	0.136794		Bacteroidetes	Hymenobacter	0.100319		Proteobacteria	Unidentified genus in Methylocystaceae	0.129101		Acidobacteria	Terriglobus	0.295622		Proteobacteria	Unidentified genus in Methylocystaceae	0.229915		Proteobacteria	Unidentified genus in Methylocystaceae	0.170781		Bacteroidetes	Unidentified genus in Chitinophagaceae	0.118405
	Proteobacteria	Unidentified genus in Polyangiaceae	0.0410736		Proteobacteria	Unidentified genus in Sphingomonadaceae	0.0723665		Acidobacteria	Terriglobus	0.100508		Proteobacteria	Unidentified genus in Methylocystaceae	0.149438		Bacteroidetes	Hymenobacter	0.140444		Bacteroidetes	Hymenobacter	0.0889867		Acidobacteria	Unidentified genus in Acidobacteriaceae	0.0959442
	Proteobacteria	Unidentified genus in Sphingomonadaceae	0.0331775		Proteobacteria	Unidentified genus in Acetobacteraceae	0.0675389		Proteobacteria	Unidentified genus in Rhizobiales	0.0985958		Proteobacteria	Unidentified genus in Sphingomonadaceae	0.083629		Verrucomicrobia	Unidentified genus in [Chthoniobacteraceae]	0.0911055		Proteobacteria	Methylobacterium	0.0611851		Proteobacteria	Unidentified genus in Acetobacteraceae	0.0767522
	Acidobacteria	Unidentified genus in family Ellin6075	0.0300486		Actinobacteria	Actinomycetospora	0.0663802		Proteobacteria	Unidentified genus in Acetobacteraceae	0.0846131		Proteobacteria	Unidentified genus in Rhizobiales	0.0572999		Proteobacteria	Unidentified genus in Acetobacteraceae	0.0598414		Proteobacteria	Unidentified genus in Sphingomonadaceae	0.0571597		Proteobacteria	Unidentified genus in Enterobacteriaceae	0.0653045
	Bacteroidetes	Unidentified genus in Sphingobacteriaceae	0.0201841		Proteobacteria	Methylobacterium	0.0584146		Proteobacteria	Unidentified genus in Caulobacteraceae	0.0616672		Proteobacteria	Unidentified genus in Acetobacteraceae	0.0359058		Acidobacteria	Terriglobus	0.0539982		Acidobacteria	Terriglobus	0.056623		Acidobacteria	Unidentified genus in Solibacteraceae	0.0448566
	Gemmatimonadetes	Unidentified genus in class Gemm-3	0.0195014		Proteobacteria	Unidentified genus in Methylocystaceae	0.0541663		Proteobacteria	Unidentified genus in Sphingomonadaceae	0.0482522		Verrucomicrobia	Unidentified genus in [Chthoniobacteraceae]	0.0294769		Proteobacteria	Unidentified genus in Sphingomonadaceae	0.0512175		Bacteroidetes	Unidentified genus in Chitinophagaceae	0.0381602		Proteobacteria	Unidentified genus in Sphingomonadaceae	0.0432949
	Bacteroidetes	Sediminibacterium	0.0192966		Actinobacteria	Unidentified genus in Microbacteriaceae	0.0417592		Acidobacteria	Unidentified genus in Solibacteraceae	0.0477442		Bacteroidetes	Unidentified genus in Chitinophagaceae	0.0269693		Proteobacteria	Methylobacterium	0.0362994		Proteobacteria	Unidentified genus in Acetobacteraceae	0.0338665		Proteobacteria	Unidentified genus in Methylocystaceae	0.0373698
	Proteobacteria	Burkholderia	0.0187277		Bacteroidetes	Rudanella	0.033697		Acidobacteria	Unidentified genus in Acidobacteriaceae	0.0449955		Proteobacteria	Methylobacterium	0.0256889		Actinobacteria	Unidentified genus in Microbacteriaceae	0.0325041		Proteobacteria	Unidentified genus in Caulobacteraceae	0.0326857		Bacteroidetes	Segetibacter	0.0255036
	Verrucomicrobia	Genus DA101 in family [Chthoniobacteraceae]	0.0175445		Bacteroidetes	Unidentified genus in Chitinophagaceae	0.0214831		Proteobacteria	Methylobacterium	0.0307439		Proteobacteria	Unidentified genus in Methylobacteriaceae	0.0237149		Acidobacteria	Edaphobacter	0.0305126		Actinobacteria	Actinomycetospora	0.0297875		Acidobacteria	Terriglobus	0.0253747
	Proteobacteria	Sphingomonas	0.0172031		Proteobacteria	Sphingomonas	0.015545		Bacteroidetes	Unidentified genus in Chitinophagaceae	0.0300866		Proteobacteria	Beijerinckia	0.0185131		Proteobacteria	Unidentified genus in Caulobacteraceae	0.0287652		Proteobacteria	Sphingomonas	0.0289287		Acidobacteria	Unidentified genus in family Ellin6075	0.0241511
	Proteobacteria	Unidentified genus in Myxococcales	0.0171349		Acidobacteria	Unidentified genus in Solibacteraceae	0.0152071		Actinobacteria	Actinomycetospora	0.0257245		Actinobacteria	Actinomycetospora	0.0146984		Acidobacteria	Unidentified genus in Acidobacteriaceae	0.0284458		Proteobacteria	Unidentified genus in Rhizobiales	0.0237226		Proteobacteria	Unidentified genus in Rhizobiales	0.0228791
	Proteobacteria	Unidentified genus in order Ellin329	0.0164977		Acidobacteria	Unidentified genus in family Ellin6075	0.015014		Proteobacteria	Sphingomonas	0.0255154		Acidobacteria	Unidentified genus in Acidobacteriaceae	0.0135514		Proteobacteria	Unidentified genus in Rhizobiales	0.0283707		Acidobacteria	Unidentified genus in Acidobacteriaceae	0.0235079		Proteobacteria	Unidentified genus in Caulobacteraceae	0.0209148
	Proteobacteria	Unidentified genus in Methylocystaceae	0.0163157		Actinobacteria	Unidentified genus in Solirubrobacteraceae	0.0149174		Actinobacteria	Unidentified genus in Frankiaceae	0.0248581		Actinobacteria	Unidentified genus in Frankiaceae	0.0120575		Bacteroidetes	Spirosoma	0.0234856		Acidobacteria	Edaphobacter	0.0222735		Acidobacteria	Edaphobacter	0.0195302
	Bacteroidetes	Spirosoma	0.0152006		Proteobacteria	Unidentified genus in Aurantimonadaceae	0.0146278		Verrucomicrobia	Unidentified genus in [Chthoniobacteraceae]	0.01951		Proteobacteria	Unidentified genus in Caulobacteraceae	0.010697		Proteobacteria	Unidentified genus in Methylobacteriaceae	0.0137156		Verrucomicrobia	Unidentified genus in [Chthoniobacteraceae]	0.0179261		Proteobacteria	Sphingomonas	0.0188056
	Bacteroidetes	Flavisolibacter	0.0142563		Bacteroidetes	Spirosoma	0.0144347		Acidobacteria	Edaphobacter	0.0191814		Proteobacteria	Sphingomonas	0.0102969		Proteobacteria	Sphingomonas	0.00918758		Actinobacteria	Unidentified genus in Microbacteriaceae	0.0170674		Bacteroidetes	Hymenobacter	0.0161973
	Planctomycetes	Unidentified genus in order WD2101	0.0136533		Verrucomicrobia	Unidentified genus in [Chthoniobacteraceae]	0.0140967		Proteobacteria	Beijerinckia	0.0167015		Proteobacteria	Unidentified genus in Beijerinckiaceae	0.00821618		Bacteroidetes	Sediminibacterium	0.00774087		Acidobacteria	Unidentified genus in Solibacteraceae	0.0158866		Verrucomicrobia	Genus DA101 in family [Chthoniobacteraceae]	0.0155855
	Proteobacteria	Unidentified genus in Acetobacteraceae	0.0135054		Acidobacteria	Terriglobus	0.0140485		Planctomycetes	Unidentified genus in Isosphaeraceae	0.00976994		Acidobacteria	Unidentified genus in Solibacteraceae	0.00794942		Planctomycetes	Unidentified genus in Isosphaeraceae	0.00774087		Proteobacteria	Unidentified genus in Methylobacteriaceae	0.0136861		Actinobacteria	Unidentified genus in Nocardioidaceae	0.0133636
	Acidobacteria	Unidentified genus in Solibacterales	0.0133688		Bacteroidetes	Sediminibacterium	0.0126967		Actinobacteria	Unidentified genus in Nocardioidaceae	0.00552734		Acidobacteria	Edaphobacter	0.00549524		Proteobacteria	Beijerinckia	0.00618142		Bacteroidetes	Sediminibacterium	0.0122907		Verrucomicrobia	Unidentified genus in [Chthoniobacteraceae]	0.0112383
	Bacteroidetes	Unidentified genus in class At12OctB3	0.0130616		Gemmatimonadetes	Unidentified genus in Gemmatimonadales	0.0126002		Proteobacteria	Unidentified genus in Beijerinckiaceae	0.00510905		Actinobacteria	Unidentified genus in Solirubrobacterales	0.00522848		Armatimonadetes	Unidentified genus in Chthonomonadaceae	0.00488501		Actinobacteria	Unidentified genus in Nocardioidaceae	0.0118076		Actinobacteria	Unidentified genus in Frankiaceae	0.0109324
	Proteobacteria	Methylibium	0.0126634		Acidobacteria	Edaphobacter	0.0125036		Actinobacteria	Unidentified genus in Microbacteriaceae	0.00481028		Verrucomicrobia	Genus DA101 in family [Chthoniobacteraceae]	0.00397471		Actinobacteria	Actinomycetospora	0.00465955		Bacteroidetes	Spirosoma	0.0113783		Acidobacteria	Candidatus Solibacter	0.0108358
	Bacteroidetes	Segetibacter	0.0124245		Proteobacteria	Unidentified genus in Methylobacteriaceae	0.0123105		Bacteroidetes	Hymenobacter	0.00430236		Bacteroidetes	Segetibacter	0.00384133		Firmicutes	Streptococcus	0.00403953		Proteobacteria	Beijerinckia	0.0103049		Actinobacteria	Actinomycetospora	0.0104011
	Actinobacteria	Pseudonocardia	0.0120263		Bacteroidetes	Flavisolibacter	0.0111036		Actinobacteria	Unidentified genus in Solirubrobacterales	0.0041231		Actinobacteria	Unidentified genus in Microbacteriaceae	0.00378798		Armatimonadetes	Unidentified genus in Armatimonadaceae	0.00381407		Proteobacteria	Unidentified genus in Beijerinckiaceae	0.0089094		Proteobacteria	Beijerinckia	0.0102723
	Actinobacteria	Unidentified genus in Solirubrobacterales	0.0118783		Proteobacteria	Unidentified genus in Beijerinckiaceae	0.0103312		Planctomycetes	Unidentified genus in order WD2101	0.00403346		Actinobacteria	Unidentified genus in Nocardioidaceae	0.00368128		Planctomycetes	Unidentified genus in order WD2101	0.00379528		Bacteroidetes	Segetibacter	0.00874839		Actinobacteria	Unidentified genus in Solirubrobacterales	0.0102723
	Proteobacteria	Unidentified genus in Bradyrhizobiaceae	0.0115939		Bacteroidetes	Prevotella	0.0100898		Proteobacteria	Unidentified genus in Methylobacteriaceae	0.0035853		Proteobacteria	Unidentified genus in Comamonadaceae	0.00320111		Actinobacteria	Actinomyces	0.00379528		Bacteroidetes	Unidentified genus in Sphingobacteriaceae	0.00794332		Planctomycetes	Unidentified genus in order WD2101	0.00951553
	Proteobacteria	Unidentified genus in Alphaproteobacteria	0.011355		Actinobacteria	Unidentified genus in Nocardioidaceae	0.00878633		Bacteroidetes	Flavisolibacter	0.00319689		Actinobacteria	Unidentified genus in Solirubrobacteraceae	0.00317443		Bacteroidetes	Unidentified genus in Chitinophagaceae	0.00377649		Abditibacteriota	Unidentified	0.00735294		Actinobacteria	Unidentified genus in Actinomycetales	0.00795376
	Acidobacteria	Unidentified genus in order iii1-15	0.0112867		Proteobacteria	Unidentified genus in Caulobacteraceae	0.00844839		Acidobacteria	Candidatus Solibacter	0.00304751		Acidobacteria	Unidentified genus in Solibacterales	0.0029877		Actinobacteria	Unidentified genus in Frankiaceae	0.00353224		Actinobacteria	Unidentified genus in Frankiaceae	0.00719193		Armatimonadetes	Unidentified genus in order FW68	0.00724533
	Proteobacteria	Unidentified genus in Rickettsiales	0.0106951		Actinobacteria	Unidentified genus in Frankiaceae	0.0070001		Actinobacteria	Pseudonocardia	0.00274873		Proteobacteria	Methylibium	0.00285432		Proteobacteria	Unidentified genus in Beijerinckiaceae	0.0029498		Proteobacteria	Methylibium	0.00644053		Proteobacteria	Methylobacterium	0.00713262
	Verrucomicrobia	Genus Ellin506 in family [Chthoniobacteraceae]	0.0103196		Abditibacteriota	Unidentified	0.00656561		Actinobacteria	Unidentified genus in Actinomycetales	0.00253959		Gemmatimonadetes	Unidentified genus in Gemmatimonadales	0.00285432		Bacteroidetes	Olivibacter	0.00274312		Tenericutes	Unidentified genus in Mollicutes	0.00579648		Proteobacteria	Unidentified genus in Bradyrhizobiaceae	0.00685891
	Actinobacteria	Actinomycetospora	0.00987587		Proteobacteria	Unidentified genus in Rhizobiales	0.00656561		Actinobacteria	Unidentified genus in Patulibacteraceae	0.00250971		Proteobacteria	Unidentified genus in Aurantimonadaceae	0.00250754		Proteobacteria	Labrys	0.0024613		Proteobacteria	Unidentified genus in Myxococcales	0.00568914		Actinobacteria	Pseudonocardia	0.00627928
	Proteobacteria	Unidentified genus in Sinobacteraceae	0.00967107		Planctomycetes	Unidentified genus in Isosphaeraceae	0.00651733		Actinobacteria	Unidentified genus in Intrasporangiaceae	0.00244996		Bacteroidetes	Hymenobacter	0.00237416		Acidobacteria	Unidentified genus in Solibacteraceae	0.00201037		Proteobacteria	Unidentified genus in Rhodospirillaceae	0.00509875		Proteobacteria	Unidentified genus in Rhodospirillaceae	0.00611828
